# Supplementary material for: Outcomes of COVID-19 Infection and Vaccination Among Individuals With Myasthenia Gravis
Source: PubMed Central journal article supplement (PMC10130942; doi:10.1001/jamanetworkopen.2023.9834), 2023-04-25
Supplement: jamanetwopen-e239834-s001.pdf [file jamanetwopen-e239834-s001.pdf]

## Supplementary Online Content

Alcantara M, Koh M, Park AL, Bril V, Barnett C. Outcomes of COVID-19 infection and vaccination among individuals with myasthenia gravis. *JAMA Netw Open*. 2023;6(4):e239834. doi:10.1001/jamanetworkopen.2023.9834

**eTable 1.** Databases Used in the Study

**eTable 2.** Databases and Variables Used to Define Study Exposures, Outcomes and Covariates

This supplementary material has been provided by the authors to give readers additional information about their work.

**eTable 1.** Databases Used in the Study

| <b>Database</b>                                                             | <b>Time frame</b> | <b>Description</b>                                                                                                                                                                                                                  |
|-----------------------------------------------------------------------------|-------------------|-------------------------------------------------------------------------------------------------------------------------------------------------------------------------------------------------------------------------------------|
| Canadian Institutes of Health Information Discharge Abstract Database (DAD) | 1988-2021         | Data for acute care institutions in Ontario.                                                                                                                                                                                        |
| Canadian Institutes of Health Information Same Day Surgery (SDS) database   | 1991-2021         | Data for day surgery institutions in Ontario                                                                                                                                                                                        |
| National Ambulatory Care Reporting System (NACRS)                           | 2000-2021         | Data on emergency department visits, day surgery and outpatient clinic visits                                                                                                                                                       |
| Ontario Health Insurance Plan (OHIP) database                               | 1991-2021         | Physicians claims for services provided, including a diagnostic code.                                                                                                                                                               |
| Ontario Drug Benefit Claims (ODB) database                                  | 1990-2021         | Claims for prescription drugs received under the ODB program. Claims are for persons $\geq$ age 65 years, or $<$ 65 years and unemployed, have disabilities, or have high prescription costs relative to net household income.      |
| Registered Persons Database (RPDB)                                          | 1991-2021         | Demographic information (age, sex, geographic information and vital statistics) about every individual who has ever received a provincial OHIP health card number                                                                   |
| Case and Contact Management (CCM)                                           | 2020-2021         | Data from the central data repository for COVID-19 case and contact management, and reporting in Ontario.                                                                                                                           |
| Ontario COVID-19 Vaccine Data (COVAXON)                                     | 2020-2021         | Information on COVID-19 vaccination events.                                                                                                                                                                                         |
| COVID19 Integrated Testing Data (C19INTGR)                                  | 2020-2021         | Created by ICES, this is a comprehensive dataset of all available COVID-19 diagnostic lab results in Ontario, including those from Ontario Laboratories Information System, Distributed testing laboratories, and Public Health CCM |
| Continuing Care Reporting System (CCRS)                                     | 2018-2020         | Clinical and demographic information on residents receiving facility based continuing care services.                                                                                                                                |

|                                                       |           |                                                                                                                                                                                                                                                                                                                            |
|-------------------------------------------------------|-----------|----------------------------------------------------------------------------------------------------------------------------------------------------------------------------------------------------------------------------------------------------------------------------------------------------------------------------|
| Ontario Asthma Dataset (ASTHMA)                       | 1996-2020 | Data on prevalent and incident cases of asthma in Ontario                                                                                                                                                                                                                                                                  |
| Ontario Diabetes Database (ODD)                       | 1991-2020 | Data on prevalent and incident cases of diabetes in Ontario                                                                                                                                                                                                                                                                |
| Chronic Obstructive Pulmonary Disease (COPD) database | 1991-2020 | Data on prevalent and incident cases of COPD in Ontario                                                                                                                                                                                                                                                                    |
| Ontario Congestive Heart Failure (CHF) database       | 1991-2020 | Data on prevalent and incident cases of CHF in Ontario. The CHF database is limited to those 40 years of age or older.                                                                                                                                                                                                     |
| Ontario Hypertension Database (HYPER)                 | 1991-2020 | Data on prevalent and incident cases of hypertension in Ontario                                                                                                                                                                                                                                                            |
| Ontario Rheumatoid Arthritis Database (ORAD)          | 1993-2020 | Data on prevalent and incident cases of rheumatoid arthritis in Ontario                                                                                                                                                                                                                                                    |
| Drugs List (DIN)                                      | 1990-2021 | The file contains a near exhaustive list of DINs (Drug Identification Numbers) used in Canada from 1990 forward.                                                                                                                                                                                                           |
| Ontario Marginalization Index (ONMARG) (1)            | 2016      | ON-MARG is a geographically (Census) based index developed to quantify the degree of marginalization occurring across the province of Ontario. It is comprised of 4 major dimensions thought to underlie the construct of marginalization: residential instability, material deprivation, dependency and ethnic diversity. |
| Statistics Canada Census                              | 2016      | Used to identify the Census based neighbourhood income quintile                                                                                                                                                                                                                                                            |

|                                         |      |                                                                                                                                                                                                                                                                                                                                                                                                                                                                        |
|-----------------------------------------|------|------------------------------------------------------------------------------------------------------------------------------------------------------------------------------------------------------------------------------------------------------------------------------------------------------------------------------------------------------------------------------------------------------------------------------------------------------------------------|
| Local Health Integration Network (LHIN) | 2009 | Local Health Integration Networks (LHINs) are not-for-profit corporations that will be responsible for planning, integrating and funding local health services in 14 different geographic areas of the province. LHINs are intended to be the managers for health services that are delivered in hospitals, long-term care facilities, community health centres, community support services and mental health agencies. Used to identify geographic area of residence. |
|-----------------------------------------|------|------------------------------------------------------------------------------------------------------------------------------------------------------------------------------------------------------------------------------------------------------------------------------------------------------------------------------------------------------------------------------------------------------------------------------------------------------------------------|

**eTable 2.** Databases and Variables Used to Define Study Exposures, Outcomes and Covariates

| <b>Condition</b>                    | <b>Definition</b>                                                                                                                                                                                                                                                                                                                                                                                                                                                          |
|-------------------------------------|----------------------------------------------------------------------------------------------------------------------------------------------------------------------------------------------------------------------------------------------------------------------------------------------------------------------------------------------------------------------------------------------------------------------------------------------------------------------------|
| <b><i>Exposure</i></b>              |                                                                                                                                                                                                                                                                                                                                                                                                                                                                            |
| Myasthenia gravis (MG) cases        | <p>1 hospitalization (DAD) with a MG diagnostic code, or 5 outpatient visits (OHIP) with a MG diagnostic code and 1 relevant service code within 1 year, or 3 prescriptions (ODB), within 1 year.</p> <p><u>DAD</u><br/>ICD-9 diagnostic codes: 358.0, 358.00, 358.01<br/>ICD-10-CA diagnostic codes: G70.0, G70.1, G70.2</p> <p><u>OHIP</u><br/>OHIP diagnostic code: 358<br/>OHIP service codes: G458, G419</p> <p><u>ODB</u><br/>3 prescriptions for pyridostigmine</p> |
| <b><i>Controls</i></b>              |                                                                                                                                                                                                                                                                                                                                                                                                                                                                            |
| Rheumatoid arthritis (RA) controls  | <p>1 hospitalization (DAD) with an RA diagnostic code, or 3 outpatient visits (OHIP) with an RA diagnostic code within 2 years, with at least 1 diagnosis by a musculoskeletal specialist.</p> <p><u>DAD</u><br/>ICD-9 diagnostic codes: 714<br/>ICD-10-CA diagnostic codes: M05, M06</p> <p><u>OHIP</u><br/>OHIP diagnostic code: 714<br/>OHIP specialty: Rheumatology, Orthopedic surgery, Internal medicine</p>                                                         |
| <b><i>Outcomes</i></b>              |                                                                                                                                                                                                                                                                                                                                                                                                                                                                            |
| COVID-19 positive PCR test          | The date of the earliest occurring positive test result in C19INTGR                                                                                                                                                                                                                                                                                                                                                                                                        |
| COVID-19 emergency department visit | ED visit in NACRS $\leq$ 3 days before or $\leq$ 14 days after the earliest positive COVID-19 test                                                                                                                                                                                                                                                                                                                                                                         |

|                                                          |                                                                                                                                                                                                                                                                        |
|----------------------------------------------------------|------------------------------------------------------------------------------------------------------------------------------------------------------------------------------------------------------------------------------------------------------------------------|
| COVID-19 acute-care hospitalization                      | Hospitalization in DAD $\leq$ 3 days before or $\leq$ 14 days after the earliest positive COVID-19 test; or in-hospital death $\leq$ 3 days after hospitalization (DAD) with the earliest positive COVID-19 test $\leq$ 7 days after death; or Hospitalized=YES in CCM |
| COVID-19 intensive care unit (ICU) admission             | Any hospitalization above with an ICU admission $\leq$ 3 days before or $\leq$ 14 days after the earliest positive COVID-19 test                                                                                                                                       |
| COVID-19 death                                           | Death date in RPDB $\leq$ 7 days before or $\leq$ 30 days after the earliest positive COVID-19 test; or Outcome = FATAL in CCM                                                                                                                                         |
| COVID-19 vaccination status                              | Date(s) of COVID-19 vaccination in COVaxON                                                                                                                                                                                                                             |
| <b><i>Covariates</i></b>                                 |                                                                                                                                                                                                                                                                        |
| Age at baseline                                          | Age in RPDB                                                                                                                                                                                                                                                            |
| Sex                                                      | Sex in RPDB                                                                                                                                                                                                                                                            |
| Geographic area of residence at baseline                 | Local Health Integration Network of the individual's postal code in RPDB                                                                                                                                                                                               |
| Long-term care residence within 2 years before baseline  | Admission date to LTC in CCRS within 2 years before baseline or a claim in ODB prior to baseline indicating that the claimant is in a LTC facility                                                                                                                     |
| Rural residence at baseline                              | Census                                                                                                                                                                                                                                                                 |
| Dissemination area income quintile at baseline           | Census                                                                                                                                                                                                                                                                 |
| Dissemination area ethnic diversity quintile at baseline | Ethnic Diversity Quintile in ONMARG                                                                                                                                                                                                                                    |

|                                              |                                                                                                                                                                                                                                                                                                                                                                                                                                                                                  |
|----------------------------------------------|----------------------------------------------------------------------------------------------------------------------------------------------------------------------------------------------------------------------------------------------------------------------------------------------------------------------------------------------------------------------------------------------------------------------------------------------------------------------------------|
| <p>Hypertension any time before baseline</p> | <p>Hypertension was defined as<br/> a) one hospital admission with a hypertension diagnosis, or<br/> b) an OHIP claim with a hypertension diagnosis followed within two years by either an OHIP claim or a hospital admission with a hypertension diagnosis.(2)</p> <p><u>DAD, SDS</u><br/> ICD-9 diagnostic codes: 401, 402, 403 404, 405<br/> ICD-10-CA diagnostic codes: I10, I11, I12, I13, I15</p> <p><u>OHIP</u><br/> OHIP diagnostic codes: 401, 402, 403 404, or 405</p> |
| <p>Asthma any time before/at baseline</p>    | <p>Asthma database was used to identify patients with asthma, based on 2 or more ambulatory care visits and/or 1 or more hospitalizations.(3)</p> <p><u>OHIP</u><br/> OHIP diagnostic code: 493</p> <p><u>DAD</u><br/> ICD-9 diagnostic code: 493<br/> ICD-10-CA diagnostic codes: J45, J46</p>                                                                                                                                                                                  |
| <p>Diabetes any time before baseline</p>     | <p>ODD was used to identify patients with diabetes, based on 2 OHIP diagnostic codes or 1 OHIP service code or 1 DAD/SDS admission within 2 years.(4)</p> <p><u>OHIP</u><br/> OHIP diagnostic code: 250<br/> OHIP service codes: Q040, K029, K030, K045, K046</p> <p><u>DAD, SDS</u><br/> ICD-9 diagnostic code: 250<br/> ICD-10-CA diagnostic codes: E10, E11, E13, E14</p>                                                                                                     |

|                                                                              |                                                                                                                                                                                                                                                                                                                                         |
|------------------------------------------------------------------------------|-----------------------------------------------------------------------------------------------------------------------------------------------------------------------------------------------------------------------------------------------------------------------------------------------------------------------------------------|
| <p>Chronic pulmonary obstructive disease (COPD) any time before baseline</p> | <p>COPD database was used to identify patients with COPD, based on 3 or more ambulatory care visits and/or 1 or more hospitalizations within 2 years.(5)</p> <p><u>OHIP</u><br/>OHIP diagnostic codes: 491, 492, 496</p> <p><u>DAD</u><br/>ICD-9 diagnostic codes: 491, 492, 496<br/>ICD-10-CA diagnostic codes: J41, J42, J43, J44</p> |
| <p>Congestive heart failure (CHF) any time before baseline</p>               | <p>CHF database was used to identify patients with CHF, based on 1 NACRS, DAD, SDS, or OHIP claim and a second claim (from either) in 1 year.(6)</p> <p><u>OHIP</u><br/>OHIP diagnostic code: 428</p> <p><u>NACRS, DAD, SDS</u><br/>ICD-9 diagnostic code: 428<br/>ICD-10-CA diagnostic codes: I500, I501, I509</p>                     |



|                                                                        |                                                                                                                                                                                                                                                                                                                                                                                                                                                                                                                                                                                                                                                                                                                                                                                                                                                                                                                                                                                                                                                                                                                                                                                                                                                                                                                                                                                                                                                                                                                                                                                                                           |
|------------------------------------------------------------------------|---------------------------------------------------------------------------------------------------------------------------------------------------------------------------------------------------------------------------------------------------------------------------------------------------------------------------------------------------------------------------------------------------------------------------------------------------------------------------------------------------------------------------------------------------------------------------------------------------------------------------------------------------------------------------------------------------------------------------------------------------------------------------------------------------------------------------------------------------------------------------------------------------------------------------------------------------------------------------------------------------------------------------------------------------------------------------------------------------------------------------------------------------------------------------------------------------------------------------------------------------------------------------------------------------------------------------------------------------------------------------------------------------------------------------------------------------------------------------------------------------------------------------------------------------------------------------------------------------------------------------|
| <p>Charlson comorbidity index score within 5 years before baseline</p> | <p>Charlson Index = Weighted sum of the indicators below identified using DAD and SDS diagnostic codes.(7)</p> <ol style="list-style-type: none"> <li>1. Acute Myocardial Infarction (Weight=1)<br/>ICD-9: 410, 412<br/>ICD-10-CA: I21, I22, I252</li> <li>2. Congestive Heart Failure<sup>a</sup> (Weight=1)<br/>ICD-9: 3989, 4020, 4021, 4029, 4040, 4041, 4049, 4254-4259, 428<br/>ICD-10-CA: I099, I255, I420, I425-I429, I43, I50, P290</li> <li>3. Peripheral Vascular Disease (Weight=1)<br/>ICD-9: 0930, 4373, 440, 441, 4431-4439, 4471, 5571, 5579, V434<br/>ICD-10-CA: I70, I71, I731, I738, I739, I771, I790, I792, K551, K558, K559, Z958, Z959</li> <li>4. Cerebrovascular Disease<sup>a</sup> (Weight=1)<br/>ICD-9: 3623, 430-438<br/>ICD-10-CA: G45, G46, H340, I60-I69</li> <li>5. Dementia (Weight=1)<br/>ICD-9: 290, 2941, 3312<br/>ICD-10-CA: F00-F03, F051, G30, G311</li> <li>6. Chronic Obstructive Pulmonary Disease/other Respiratory<sup>a</sup> (Weight=1)<br/>ICD-9: 4168, 4169, 490-505, 5064, 5081, 5088<br/>ICD-10-CA: I278, I279, J40-J47, J60-J67, J684, J701, J703</li> <li>7. Rheumatic-like Diseases (Weight=1)<br/>ICD-9: 4465, 7100-7104, 7140-7142, 7148, 725<br/>ICD-10-CA: M05, M06, M315, M32-M34, M351, M353, M360</li> <li>8. Ulcers of the Digestive System (Weight=1)<br/>ICD-9: 531-534<br/>ICD-10-CA: K25-K28</li> <li>9. Liver Disease - Mild<sup>ab</sup> (Weight=1)<br/>ICD-9: 0702, 0703, 0704, 0705, 0706, 0709, 570, 571, 5733, 5734, 5738, 5739, V427<br/>ICD-10-CA: B18, K700-K703, K709, K713-K715, K717, K73, K74, K760, K762-K764, K768, K769, Z944</li> </ol> |
|------------------------------------------------------------------------|---------------------------------------------------------------------------------------------------------------------------------------------------------------------------------------------------------------------------------------------------------------------------------------------------------------------------------------------------------------------------------------------------------------------------------------------------------------------------------------------------------------------------------------------------------------------------------------------------------------------------------------------------------------------------------------------------------------------------------------------------------------------------------------------------------------------------------------------------------------------------------------------------------------------------------------------------------------------------------------------------------------------------------------------------------------------------------------------------------------------------------------------------------------------------------------------------------------------------------------------------------------------------------------------------------------------------------------------------------------------------------------------------------------------------------------------------------------------------------------------------------------------------------------------------------------------------------------------------------------------------|

|  |                                                                                                                                                                                                                                                                                                                                                                                                                                                                                                                                                                                                                                                                                                                                                                                                                                                                                                                                                                                                                                                                                                                                                                                                                                                                                                                                                                                                                                                                                        |
|--|----------------------------------------------------------------------------------------------------------------------------------------------------------------------------------------------------------------------------------------------------------------------------------------------------------------------------------------------------------------------------------------------------------------------------------------------------------------------------------------------------------------------------------------------------------------------------------------------------------------------------------------------------------------------------------------------------------------------------------------------------------------------------------------------------------------------------------------------------------------------------------------------------------------------------------------------------------------------------------------------------------------------------------------------------------------------------------------------------------------------------------------------------------------------------------------------------------------------------------------------------------------------------------------------------------------------------------------------------------------------------------------------------------------------------------------------------------------------------------------|
|  | <p>10. Diabetes - No Chronic Complications<sup>ab</sup> (Weight=1)<br/> ICD-9: 2500-2503, 2508, 2509<br/> ICD-10-CA: E100, E101, E106, E108, E109, E110, E111, E116, E118, E119, E120, E121, E126, E128, E129, E130, E131, E136, E138, E139, E140, E141, E146, E148, E149</p> <p>11. Diabetes with Chronic Complications<sup>ab</sup> (Weight=2)<br/> ICD-9: 2504-2507<br/> ICD-10-CA: E102-E105, E107, E112-E115, E117, E122-E125, E127, E132-E135, E137, E142-E145, E147</p> <p>12. Hemiplegia or Paraplegia (Weight=2)<br/> ICD-9: 3441, 342, 343, 3440-3446, 3449<br/> ICD-10-CA: G041, G114, G801, G802, G81, G82, G830-G834, G839</p> <p>13. Renal (Kidney) Disease<sup>a</sup> (Weight=2)<br/> ICD-9: 4030, 4031, 4039, 4040, 4041, 4049, 582, 5830-5837, 585, 586, 5880, V420, V451, V56<br/> ICD-10-CA: N032-N037, N052-N057, N18, N19, N250, Z490-Z492, Z940, Z992</p> <p>14. Cancer (No secondary found)<sup>b</sup> (Weight=2)<br/> ICD-9: 140-172, 174-1958, 200-208, 2386<br/> ICD-10-CA: C00-C26, C30-C34, C37-C41, C43, C45-C58, C60-C76, C81-C85, C88, C90-C97</p> <p>15. Liver Disease - Moderate or Severe<sup>b</sup> (Weight=3)<br/> ICD-9: 4560-4562, 5722-5728<br/> ICD-10-CA: I850, I859, I864, I982, K704, K711, K721, K729, K765, K766, K767</p> <p>16. Cancer (Metastatic - secondary)<sup>b</sup> (Weight=6)<br/> ICD-9: 196-199<br/> ICD-10-CA: C77-C80</p> <p>17. HIV / AIDS<sup>a</sup> (Weight=6)<br/> ICD-9: 042-044<br/> ICD-10-CA: B20-B22, B24</p> |
|--|----------------------------------------------------------------------------------------------------------------------------------------------------------------------------------------------------------------------------------------------------------------------------------------------------------------------------------------------------------------------------------------------------------------------------------------------------------------------------------------------------------------------------------------------------------------------------------------------------------------------------------------------------------------------------------------------------------------------------------------------------------------------------------------------------------------------------------------------------------------------------------------------------------------------------------------------------------------------------------------------------------------------------------------------------------------------------------------------------------------------------------------------------------------------------------------------------------------------------------------------------------------------------------------------------------------------------------------------------------------------------------------------------------------------------------------------------------------------------------------|

Abbreviations: ICD-9: International Classification of Diseases, 9th Revision; ICD-10-CA:

International Classification of Diseases, 10th Revision, Canada

<sup>a</sup> The following hierarchy exists in creating the Charlson indicator variables: “Liver Disease - Moderate or Severe” trumps “Liver Disease – Mild”; “Diabetes with Chronic Complications” trumps “Diabetes - No Chronic Complications”; and “Cancer (Metastatic - secondary)” trumps “Cancer (No secondary found)”.

<sup>b</sup> Note that there are some minor variations from the Quan et al.<sup>7</sup> paper where 5-digit ICD-9 codes were specified (DAD only use ICD-9 codes to the 4<sup>th</sup> digit) or the ICD-10-CA coding scheme differs from the ICD-10 coding scheme.
